# Supplementary material
Source: HighWire-hosted journal article supplement (https://thorax.bmj.com/content/75/6/486)
Supplement: inline-supplementary-material-1 [file inline-supplementary-material-1.pdf]

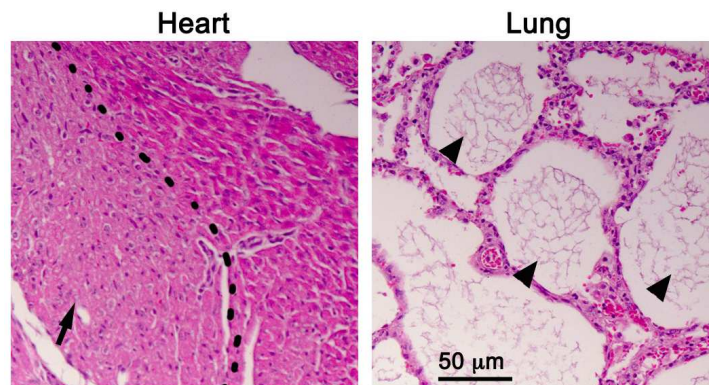

Supplementary figure 1. The heart and lung histology of died P14 *Flcn* knockout mice. The tissues were obtained by autopsy, and the sections were stained with H&E. In heart, the area with degenerated cardiomyocytes (arrow) is highlighted. In lung, alveolar edema was pointed with arrowheads.

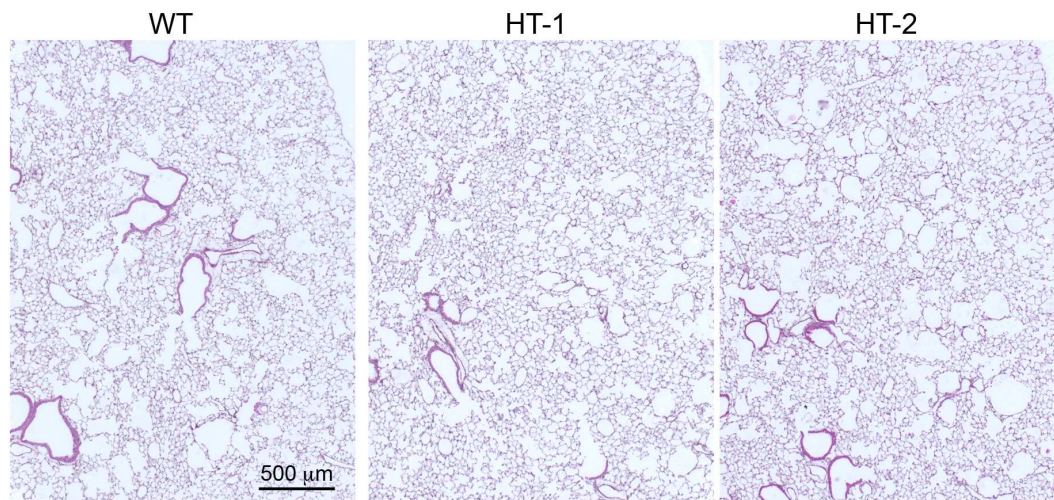

Supplementary figure 2. Histological comparison between wild type (WT) and *Fln* heterozygous knockout (HT) lungs at 4 months of age. No significant difference was observed.

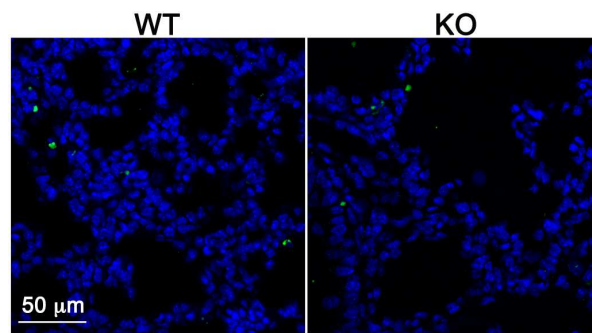

Supplementary figure 3. Immunofluorescence staining of active caspase 3. There was no increase of active caspase 3-positive cells (green) in *Fln* knockout (KO) lungs at P10 compared to wild type (WT) littermate controls.

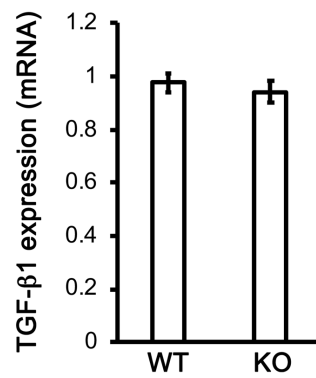

Supplementary figure 4. TGF-β1 mRNA expression in P10 lung tissues was measured by real time PCR, shown as arbitrary unit (mean  $\pm$  s.d., n=3 per genotype). WT: wild type lung tissues, KO: *Fln* knockout lung tissues by Dermo1-Cre driver.

Supplementary Table 1: The calculated ratios of normalized *Fln* KO band intensities to *Fln* WT band intensities as detected by western blot in Fig.6.

|                         | <b>P10</b>             | <b>P28</b>             |
|-------------------------|------------------------|------------------------|
| <b>pS6</b>              | 2.86 ± 0.85 (p=0.045)* | 0.56 ± 0.08 (p=0.008)* |
| <b>S6</b>               | 1.08 ± 0.09 (p=0.183)  | 0.94 ± 0.11 (p=0.243)  |
| <b>pAMPK</b>            | 2.56 ± 0.65 (p=0.038)* | 0.54 ± 0.09 (p=0.009)* |
| <b>AMPK</b>             | 1.04 ± 0.02 (p=0.064)  | 1.24 ± 0.16 (p=0.079)  |
| <b>pERK1/2</b>          | 3.15 ± 1.00 (p=0.047)* | 0.22 ± 0.10 (p=0.004)* |
| <b>ERK1/2</b>           | 0.99 ± 0.33 (p=0.478)  | 0.84 ± 0.10 (p=0.077)  |
| <b>Active β-Catenin</b> | 0.56 ± 0.05 (p=0.003)* | 0.19 ± 0.25 (p=0.023)* |
| <b>Total β -Catenin</b> | 1.28 ± 0.13 (p=0.069)  | 0.54 ± 0.10 (p=0.013)* |

Three independent pairs of samples were analyzed. Actb1 intensity of each sample was used for loading normalization. \*p<0.05
